# Supplementary material for: REV-ERBα ameliorates heart failure through transcription repression
Source: JCI journal article supplement (doi:10.1172/jci.insight.95177), 2017-09-06

## Supplemental Figure Legend

Supplemental Figure 1. REV-ERB agonist does not change blood pressure, fibroblast activity, capillary density or mitochondria. (A) Mean arterial blood pressure 4-week post TAC. 27g TAC performed on 8-week old mice, Vehicle or SR9009 were given daily starting one day after surgery. Vehicle, n=3, SR9009, n=7. (B)-(C) cardiac fibroblasts in culture were pretreated with Vehicle or SR9009 for 24 hours and then treated with TGF $\beta$ 1 for the indicated time. (B) Cardiac fibroblasts time response curve to TGF $\beta$ 1. Peak response is at 4 hours. (C) Cardiac fibroblasts CTGF and SRF expression by qRT-PCR 4 hours after TGF $\beta$ 1. (D) Capillary area 6-week post TAC. 27g TAC performed on 8-week old mice, Vehicle or SR9009 were given daily starting one day after surgery. Capillaries were labeled with anti-CD31 using immunofluorescence staining and quantified using ImagePro. (E)-(G) Mitochondrial studies 10-week post TAC. N=3. (E) Representative electron microscopy pictures. (F) qPCR of mitochondrial DNA normalized to nuclear DNA. (G) Normalized heart mitochondrial oxygen consumption ratio by Seahorse. Statistical differences were determined by 2-tailed Student's t-test. Data are presented as mean $\pm$ s.e.m.

Supplemental Figure 1.

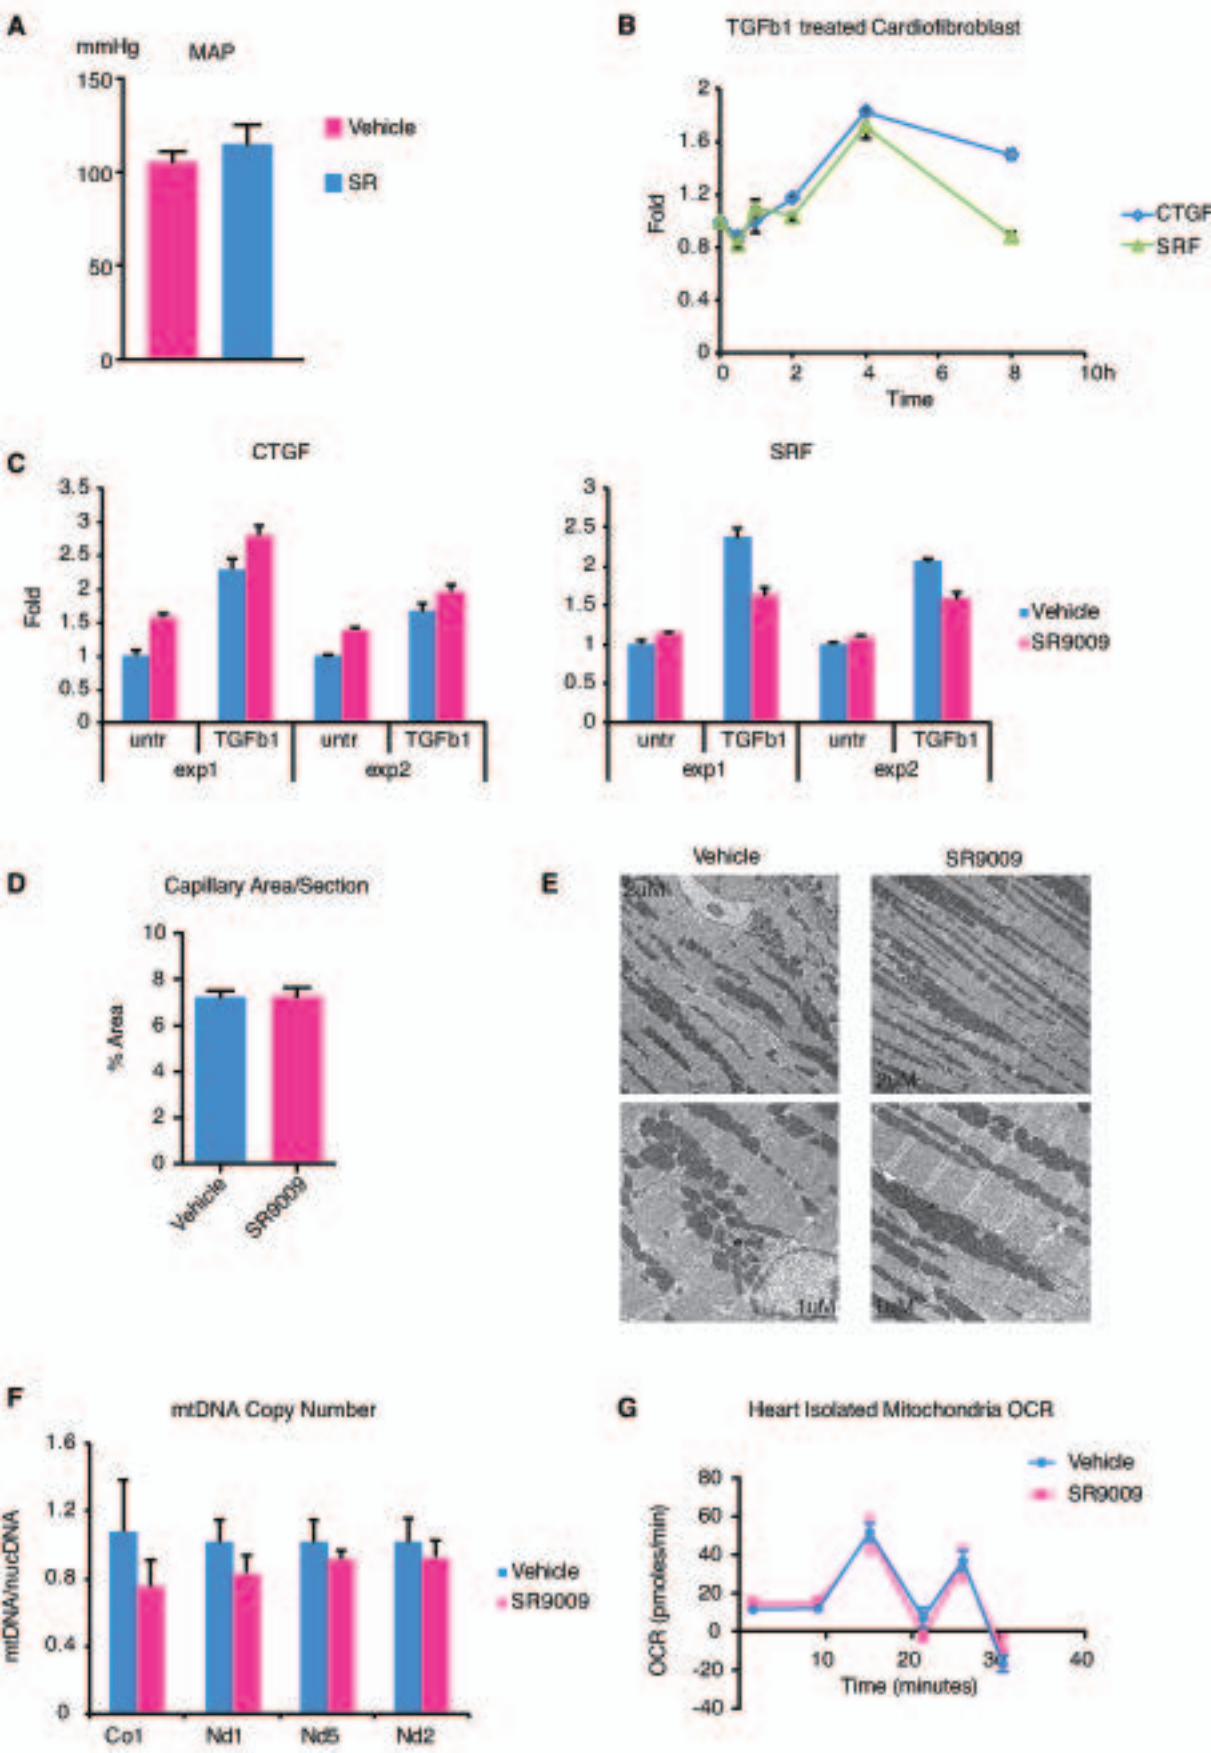

Supplement: sd1 [file 1]
